# Supplementary material
Source: MDPI journal article supplement (https://www.mdpi.com/2073-445X/12/5/1000)
Supplement: s1 [file s1]

**Table S1.** Model input and data sources.

| Related model                                        | Data requirements                   | Type      | Spatiotemporal resolution | Note                                                                                                                                                                                                                                                                                                                                                                                                                                                                                                                                                                                                                                                                                                                                                                                                                                                                                                     |
|------------------------------------------------------|-------------------------------------|-----------|---------------------------|----------------------------------------------------------------------------------------------------------------------------------------------------------------------------------------------------------------------------------------------------------------------------------------------------------------------------------------------------------------------------------------------------------------------------------------------------------------------------------------------------------------------------------------------------------------------------------------------------------------------------------------------------------------------------------------------------------------------------------------------------------------------------------------------------------------------------------------------------------------------------------------------------------|
| Carbon storage and sequestration in the InVEST model | Land use/ Land cover                | Shapefile | 2000-2020                 | Including the parameter values of the carbon density for each land use [1,2].                                                                                                                                                                                                                                                                                                                                                                                                                                                                                                                                                                                                                                                                                                                                                                                                                            |
|                                                      | carbon pools table                  | .CSV file |                           |                                                                                                                                                                                                                                                                                                                                                                                                                                                                                                                                                                                                                                                                                                                                                                                                                                                                                                          |
| Water yield in the InVEST model                      | Land use/ Land cover                | Shapefile | 2000-2020                 | Interpolated based on annual data from National Meteorological Information Center ( <a href="http://data.cma.cn/">http:// data. cma. cn/</a> )<br>Soil data from the Harmonized World Soil Database ( <a href="https://www.fao.org/">https://www.fao.org/</a> ) were used to calculate soil depth.<br>Environmental and Ecological Science Data Center for West China ( <a href="http://westdc.westgis.ac.cn/">http://westdc.westgis.ac.cn/</a> )<br>MODIS Global Evapotran-spiration Project ( <a href="http://www.ntsg.umn.edu/project/mod16">http://www. ntsg. umt. edu/ proje ct/ mod16</a> )<br>Calculated based on precipitation data from China Meteorological Data Center ( <a href="http://data.cma.cn/">http:// data. cma. cn/</a> )<br>Geospatial Data Cloud ( <a href="http://www.gscloud.cn">http:// www. gscloud. cn</a> )<br>Including water consumption (by land use category) data [2]. |
|                                                      | Annual average precipitation (mm)   | Raster    | 1 km, 2000-2020           |                                                                                                                                                                                                                                                                                                                                                                                                                                                                                                                                                                                                                                                                                                                                                                                                                                                                                                          |
|                                                      | Soil depth (mm)                     | Raster    | 1 km, 2000                |                                                                                                                                                                                                                                                                                                                                                                                                                                                                                                                                                                                                                                                                                                                                                                                                                                                                                                          |
|                                                      | Plant-available water content [0,1] | Raster    | 1 km, 2008                |                                                                                                                                                                                                                                                                                                                                                                                                                                                                                                                                                                                                                                                                                                                                                                                                                                                                                                          |
|                                                      | Reference evapotranspiration (mm)   | Raster    | 30 m, 2000-2020           |                                                                                                                                                                                                                                                                                                                                                                                                                                                                                                                                                                                                                                                                                                                                                                                                                                                                                                          |
|                                                      | Rainfall erosivity index (mm)       | Raster    | 30 m, 2000-2020           |                                                                                                                                                                                                                                                                                                                                                                                                                                                                                                                                                                                                                                                                                                                                                                                                                                                                                                          |
|                                                      | Watersheds                          | Shapefile |                           |                                                                                                                                                                                                                                                                                                                                                                                                                                                                                                                                                                                                                                                                                                                                                                                                                                                                                                          |
|                                                      | Biophysical table                   | .CSV file |                           |                                                                                                                                                                                                                                                                                                                                                                                                                                                                                                                                                                                                                                                                                                                                                                                                                                                                                                          |
| Habitat quality in the InVEST model                  | Land use/ Land cover                | Shapefile | 2000-2020                 | Threat data includes each threat's relative weight and its impact across space; sensitivity table includes the sensitivity of habitat types to each threat [2,3].                                                                                                                                                                                                                                                                                                                                                                                                                                                                                                                                                                                                                                                                                                                                        |
|                                                      | Threat data/ Sensitivity table      | .CSV file |                           |                                                                                                                                                                                                                                                                                                                                                                                                                                                                                                                                                                                                                                                                                                                                                                                                                                                                                                          |

1. Wu, W.H.; Xu, L.Y.; Zheng, H.Z.; Zhang, X.R. How much carbon storage will the ecological space leave in a rapid urbanization area? Scenario analysis from beijing-tianjin-hebei urban agglomeration. *Resour. Conserv. Recycl.* **2023**, *189*, 106774. <https://doi.org/10.1016/j.resconrec.2022.106774>.
2. Sharp, R.; Tallis, H.T.; Ricketts, T.; Guerry, A.D. *In vest 3.5.0 user's guide*. The Natural Capital Project, Stanford University, University of Minnesota, The Nature Conservancy and World Wildlife Fund: 2018.
3. Deng, Y.; Jiang, W.; Wang, W.; Lv, J.; Chen, K. Urban expansion led to the degradation of habitat quality in the beijing-tianjin-hebei area. *Acta Ecol. Sin.* **2018**, *38*, 4516-4525. <http://dx.doi.org/10.5846/stxb201712062200>.
